# Supplementary material
Source: PubMed Central journal article supplement (PMC3761388)
Supplement: NIHMS505031-supplement-02.pdf [file NIHMS505031-supplement-02.pdf]

Type of file: figure

Label: Supplemental Fig1

Filename: clinchem supp fig1.ppt

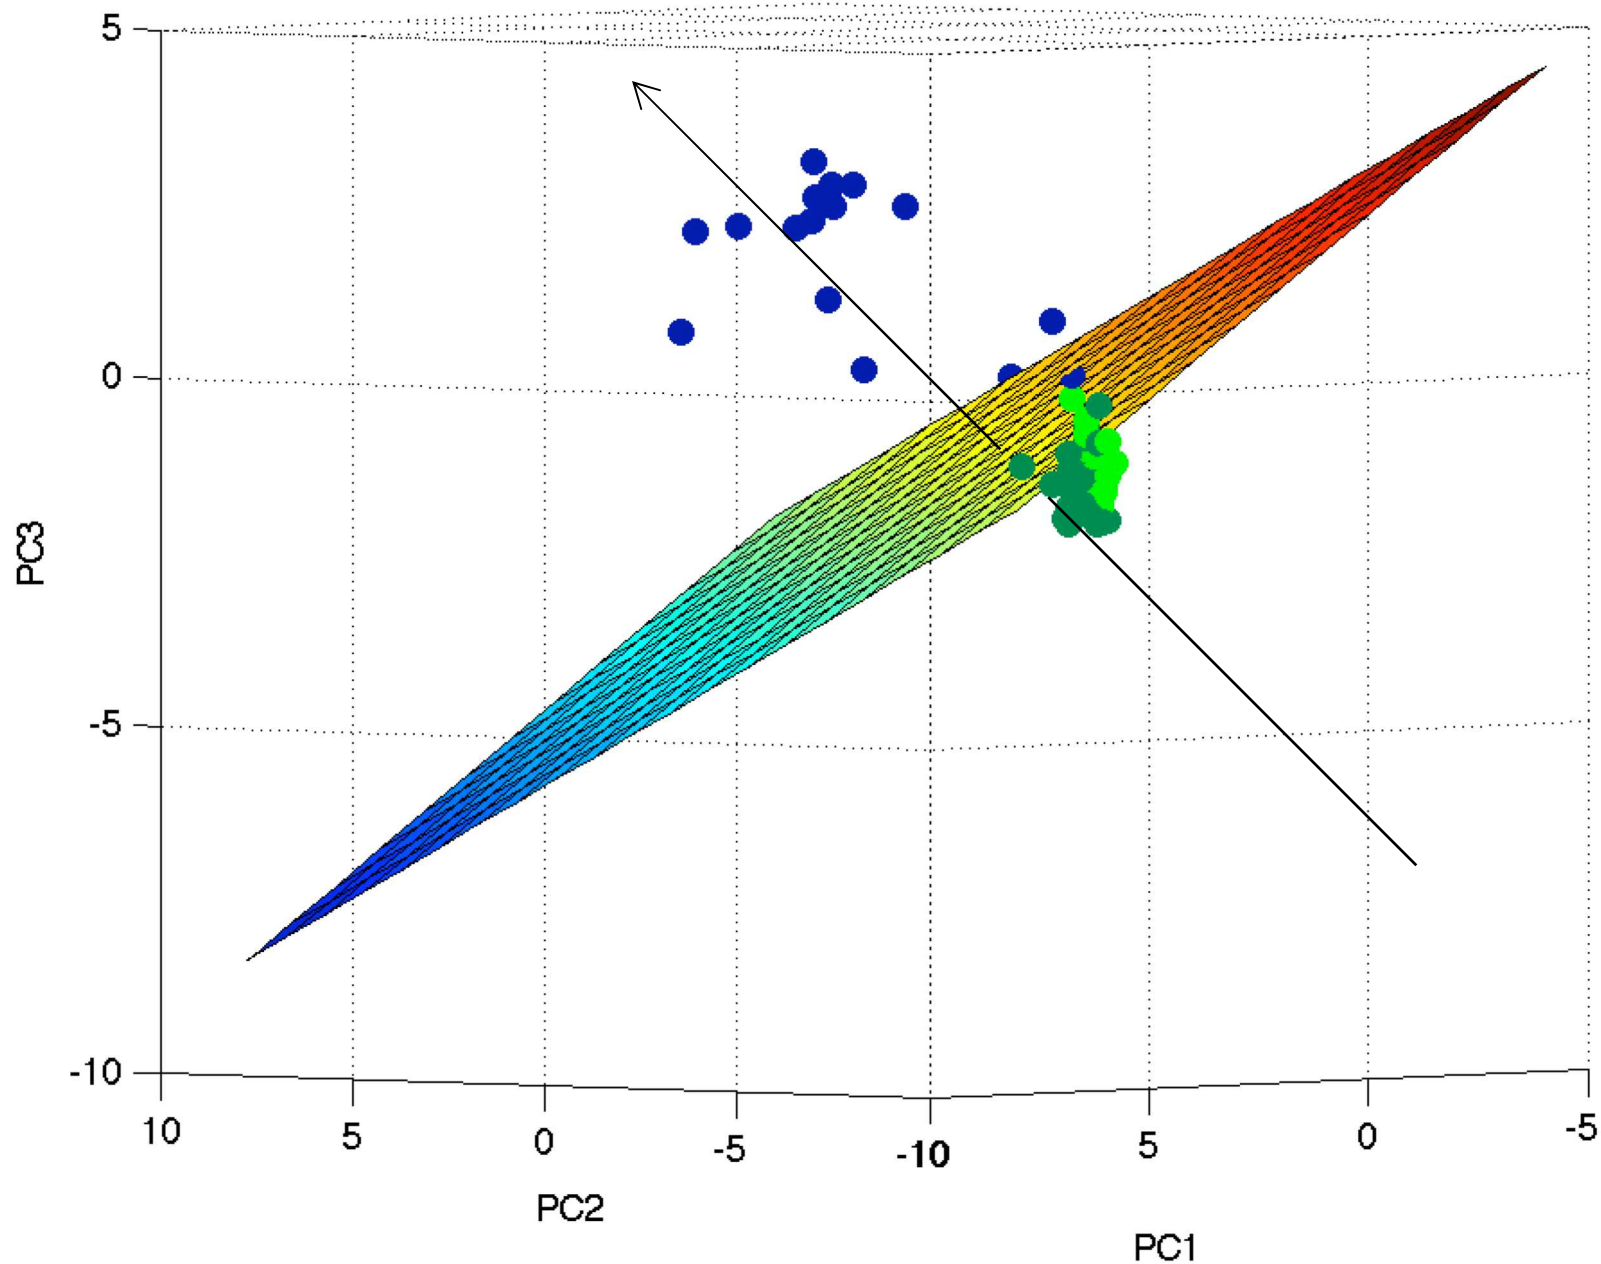

Supplemental Data Figure 1: Graphical illustration of a best-separating plane for T2D/MI/CHF (blue) vs. healthy patients (green), as seen in Figure 3, drawn by linear kernel support vector machine. A line orthogonal to this plane is established as a new univariate scale by which an ROC curve can be constructed.

Type of file: table

Label: Supplemental Table MALDI Settings

Filename: clinchem table maldi set.doc

| <b>Analyte</b>           | <b>Instrument</b> | <b>Extract 1<br/>(kV)</b> | <b>Extract 2<br/>(kV)</b> | <b>Lens<br/>(kV)</b> | <b>Delay<br/>(ns)</b> |
|--------------------------|-------------------|---------------------------|---------------------------|----------------------|-----------------------|
| transthyretin            | Autoflex III      | 20.00                     | 18.45                     | 7.50                 | 200                   |
| cystatin c               | Autoflex III      | 20.00                     | 18.45                     | 6.50                 | 180                   |
| $\beta$ -2-microglobulin | Autoflex III      | 20.00                     | 18.45                     | 6.50                 | 180                   |
| serum amyloid p          | Ultraflex III     | 25.00                     | 23.10                     | 8.50                 | 90                    |
| apolipoprotein C-I       | Ultraflex III     | 25.00                     | 23.50                     | 6.00                 | 50                    |
| apolipoprotein C-II      | Ultraflex III     | 25.00                     | 23.50                     | 6.00                 | 50                    |
| RANTES                   | Ultraflex III     | 25.00                     | 23.50                     | 6.00                 | 50                    |

Type of file: table

Label: Supplemental Table Patient Characteristics

Filename: clinchem table patient char.xls

Supplemental Table 1: Patient Characteristics

| <b>Cohort</b>  | <b>n</b> | <b>Age</b> | <b>Number of Males</b> | <b>Number of Females</b> |
|----------------|----------|------------|------------------------|--------------------------|
| Healthy Plasma | 37       | 49 (7)     | 13                     | 24                       |
| Healthy Serum  | 29       | 61 (12)    | 16                     | 13                       |
| T2D            | 50       | 53 (14)    | 25                     | 25                       |
| CHF            | 29       | 60 (14)    | 18                     | 11                       |
| CHF/MI         | 25       | 72 (13)    | 15                     | 10                       |
| CHF/MI/T2D     | 17       | 64 (10)    | 11                     | 6                        |
| CHF/T2D        | 25       | 56 (13)    | 9                      | 16                       |

Abbreviations: NYHA Class = New York Heart Association Functional Classification for Heart Failure

\* Data only available for patients with CHF

\*\* Data available only for patients in the T2D-only cohort

Average  
Stdev

Sum

| <b>NHYA Class*</b> | <b>Number of Patients w/ ACS in past 4 weeks*</b> | <b>BMI**</b> |
|--------------------|---------------------------------------------------|--------------|
| N/A                | N/A                                               | N/A          |
| N/A                | N/A                                               | N/A          |
| N/A                | N/A                                               | 37.0 (8.4)   |
| 2.1 (1.1)          |                                                   | 0 N/A        |
| 2.1 (0.5)          |                                                   | 1 N/A        |
| 2.3 (0.6)          |                                                   | 0 N/A        |
| 2.5 (0.9)          |                                                   | 1 N/A        |

ilure; ACS = Acute Coronary Syndrome; BMI = Body Mass Index; N/A = Not applicable and/c





| <b>Years Since Diagnosis**</b> |
|--------------------------------|
| N/A                            |
| N/A                            |
| 9.4 (7.2)                      |
| 5.4 (6.4)                      |
| 3.4 (4.5)                      |
| 5.4 (5.4)                      |
| 3.7 (3.0)                      |

or data not available
